# Supplementary material for: Latent-TGF-β has a domain swapped architecture
Source: PubMed Central journal article supplement (PMC11581116; doi:10.21203/rs.3.rs-5154292/v1), 2024-11-01
Supplement: NIHPPRS5154292V1-supplement-1.pdf [file NIHPPRS5154292V1-supplement-1.pdf]

## Supplementary Files

This is a list of supplementary files associated with this preprint. Click to download.

- [FigS1.jpg](#)
